# Supplementary material for: Outbreak tracking of Aleutian mink disease virus (AMDV) using partial NS1 gene sequencing
Source: PubMed Central journal article supplement (PMC5480136; doi:10.1186/s12985-017-0786-5), 2017-06-21

**Branches:**  
 Red branches: the "Saebj" cluster, purple branches: the "Holstebro" cluster, green branches: the "Zealand" cluster, turkiois branches: The "wild mink of Bornholm" cluster and yellow branches: the "Sole" cluster.

**Taxons:**  
 The sequences were assigned a unique identifier and were named according to their region of origin, sampling date and feed producer, e.g.:  
 AMDV\_mink-f\_DK\_NJ\_20-1-16\_2016-02-15\_FP-F  
 Feed suppliers are named as follows; FP-A: purple taxon, FP-B: red taxon, FP-C: green taxon, FP-D: brown taxon, FP-E: Blue taxon. Danish wild mink: Brown taxon.  
 The sequenes from GenBank is given their accession number and two letters to indicate the region of Denmark, from which they were obtained.

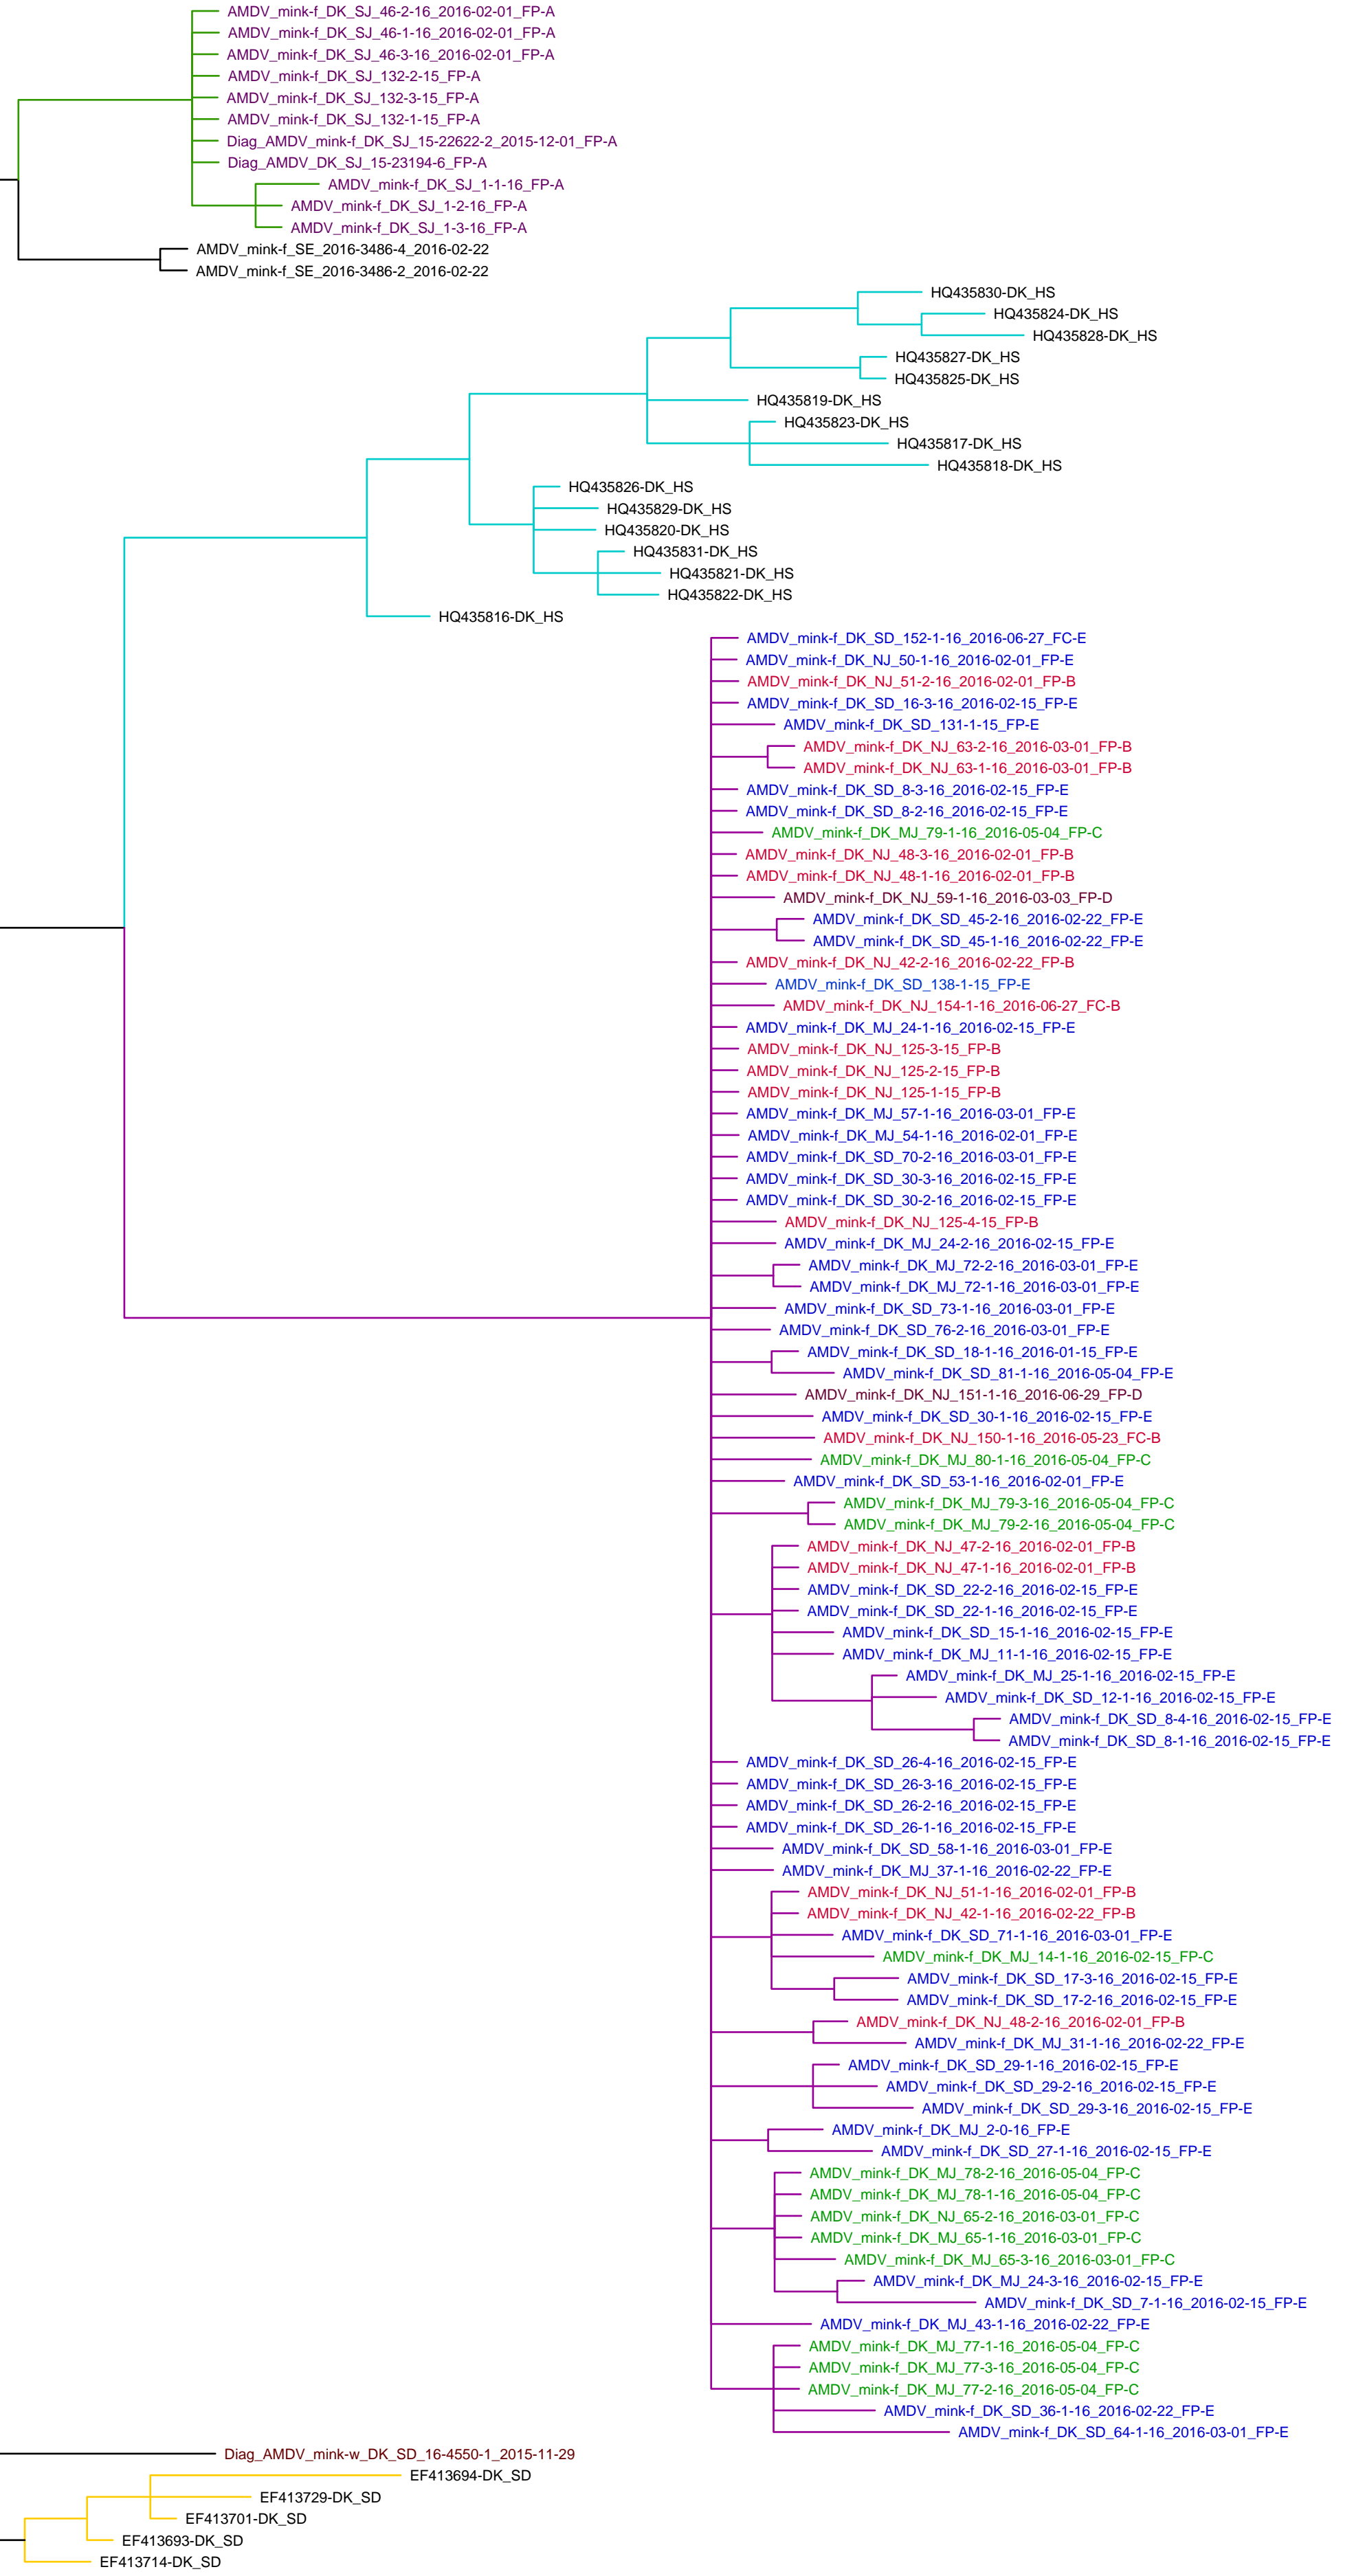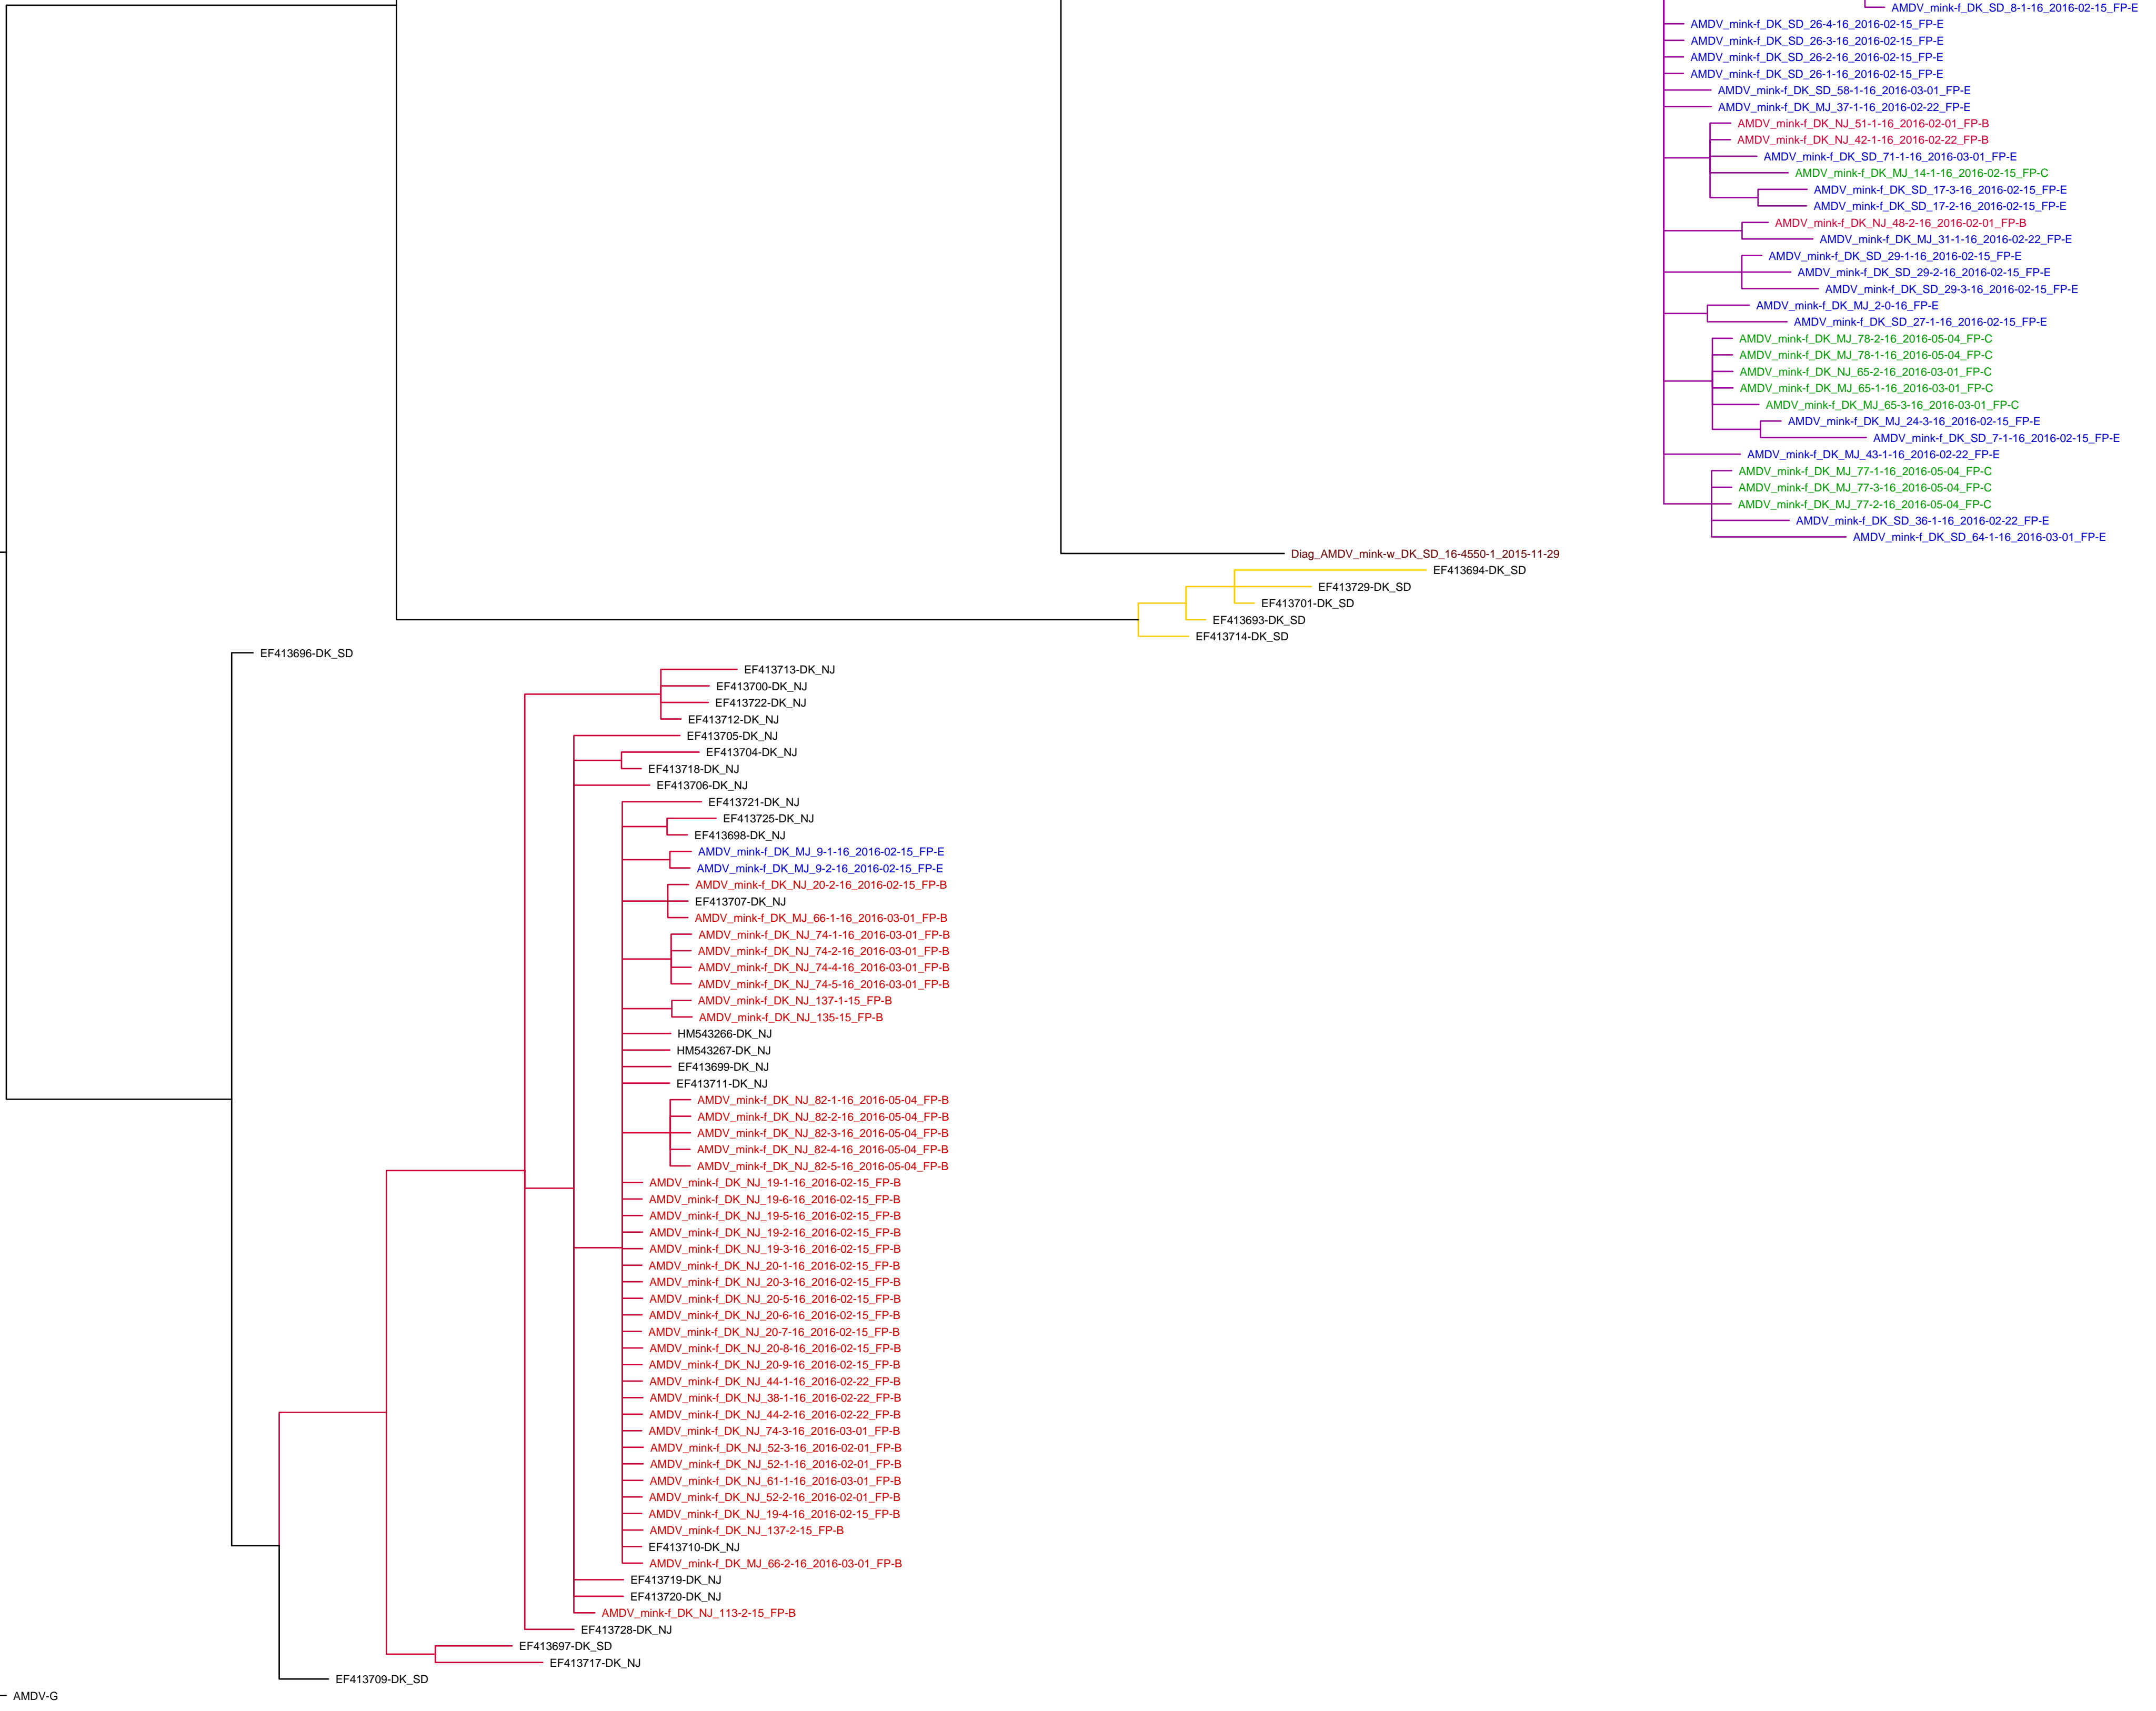

Supplement: 12985_2017_786_MOESM1_ESM.pdf [file 12985_2017_786_MOESM1_ESM.pdf]
